# Supplementary material
Source: PubMed Central journal article supplement (PMC6601526)

## **WEB MATERIAL**

### **Opioid Use and Misuse and Suicidal Behaviors in a Nationally Representative Sample of US Adults**

Hillary Samples, Elizabeth A. Stuart, and Mark Olfson

#### Contents

Web Table 1

Web Figure 1

**Web Table 1. Adjusted Propensity Score–Weighted Logistic Regression Estimates of Past-Year Suicidal Ideation, Suicide Plans, and Suicide Attempts Among Adults Who Did Not Meet Criteria for Opioid Use Disorder (*n* = 85,376)**

| Past-Year Opioid Use/Misuse | Suicidal Ideation <sup>a</sup> |            | Suicide Plans |            | Suicide Attempts |            |
|-----------------------------|--------------------------------|------------|---------------|------------|------------------|------------|
|                             | OR <sup>b</sup>                | 95% CI     | OR            | 95% CI     | OR               | 95% CI     |
| No opioid use               | 0.64                           | 0.51, 0.81 | 0.61          | 0.45, 0.81 | 0.64             | 0.41, 1.01 |
| Opioid use without misuse   | 0.59                           | 0.48, 0.74 | 0.54          | 0.38, 0.78 | 0.80             | 0.52, 1.25 |
| Opioid misuse               | 1.00                           | Referent   | 1.00          | Referent   | 1.00             | Referent   |

Abbreviations: OR, odds ratio; CI, confidence interval.

<sup>a</sup> All models controlled for sociodemographic characteristics (sex, age, race/ethnicity, education, employment, income, marital status, insurance, urban/rural, children), past-year drug use (heroin, cocaine, methamphetamine, stimulants, sedatives/tranquilizers), comorbidities (depression, nicotine dependence, alcohol use disorder, cannabis use disorder, number of comorbid chronic conditions) and self-rated health. Sensitivity models excluded individuals who met criteria for opioid use disorder.

<sup>b</sup> ORs and CIs were computed with propensity score weighted data.

**Web Figure 1. Balance Between Covariates Before and After Propensity Score Weighting**

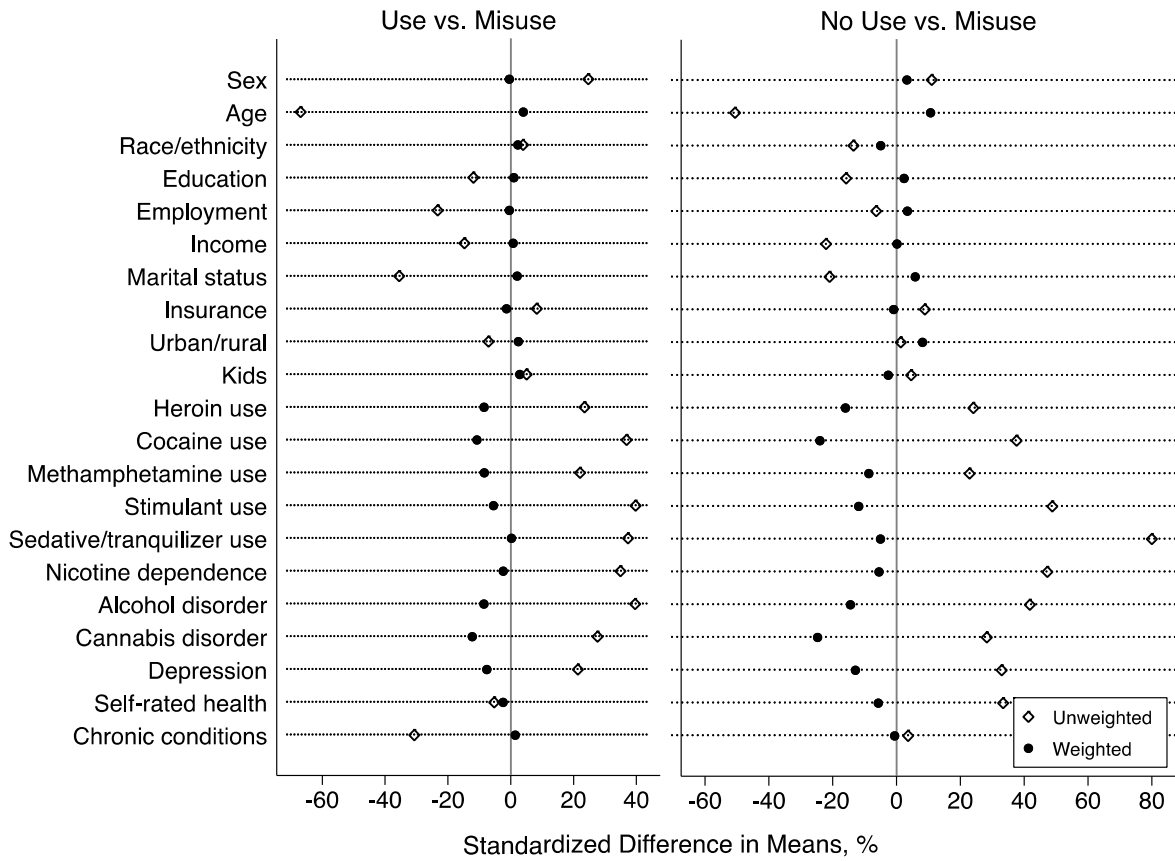

Supplement: kwz061_samples_web_material_final.pdf [file kwz061_samples_web_material_final.pdf]
